# Supplementary material for: Serum 25-hydroxyvitamin D levels in relation to lipids and clinical outcomes in pregnant women with gestational diabetes mellitus: an observational cohort study
Source: HighWire-hosted journal article supplement (doi:10.1136/bmjopen-2020-039905), 2020-11-01

**Supplementary Figure 1 The flow diagram of the research**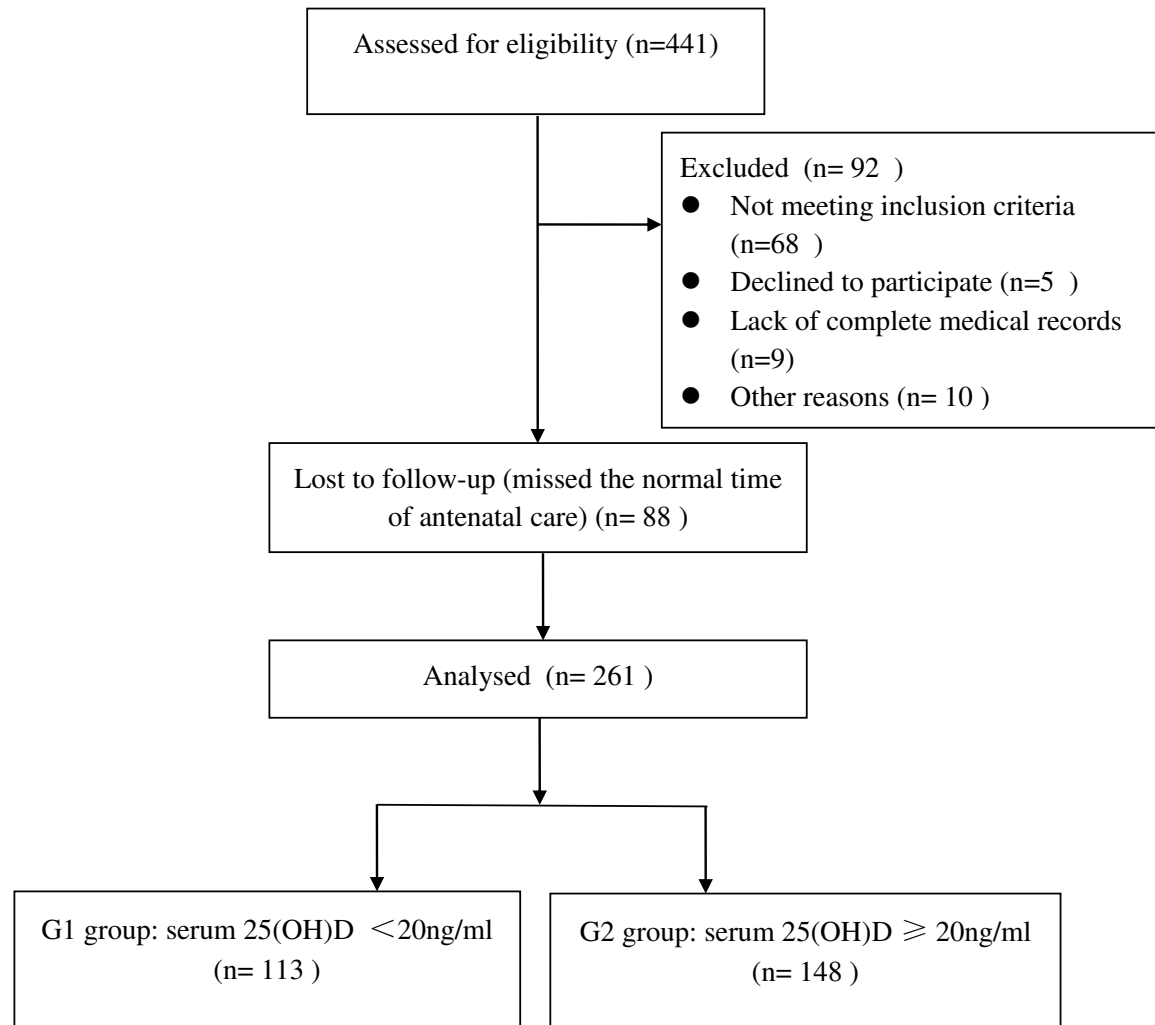

Supplement: bmjopen-2020-039905supp001_data_supplement.pdf [file bmjopen-2020-039905supp001_data_supplement.pdf]
